# Supplementary material for: DC-derived whole cell cytokine nano-regulator for remodelling extracellular matrix and synergizing tumor immunotherapy
Source: Royal Society of Chemistry journal article supplement (doi:10.1039/d4md00496e), 2024-01-01
Supplement: d4md00496e1.pdf [file d4md00496e1.pdf]

## Electronic Supplementary Information (ESI)

DC-Derived Whole Cell Cytokines Nano-Regulator for Remodeling Extracellular Matrix and Synergizing Tumor Immunotherapy

Jingsong Lu <sup>a##</sup>, Ying Li <sup>b#</sup>, Xiaohan Gao <sup>b</sup>, Sumei Chen <sup>b</sup>, Zeping Jin <sup>b</sup>, Xiaoxiao Guo <sup>b</sup>, Wensheng Xie <sup>c</sup>, Zhenhu Guo <sup>b</sup>, Yen Wei <sup>a\*</sup>, Lingyun Zhao <sup>b\*</sup>

<sup>a</sup> Department of Chemistry, Tsinghua University, Beijing 100084, China

<sup>b</sup> School of Materials Science and Engineering, Tsinghua University, Beijing 100084, China

<sup>c</sup> College of Life Science and Technology, Beijing University of Chemical Technology, Beijing 100029, China.

\* Corresponding authors

lujingsong2022@mail.tsinghua.edu.cn;

weiyen@tsinghua.edu.cn;

lyzhao@mail.tsinghua.edu.cn

# These authors contributed equally

## Experimental details:

**Characterization:** The microscopic morphologies of TCP were observed by a transmission electron microscope (TEM, Hitachi, 120 kV). The hydrodynamic size was measured by a particle size analyzer (Zetasizer Nano ZS-90, Malvern, England). XRD patterns of TA and TCP were obtained using an X-ray diffractometer (Shimadzu Cu K $\alpha$  radiation,  $\lambda = 0.15405$  nm) with a scanning rate of  $10^\circ \text{ min}^{-1}$  with  $2\theta$  ranging from 20 to  $80^\circ$ . Moreover, the absorbance values between 230 and 600 nm wavelength and the cell counting kit (CCK-8) assay in 450 nm were collected by the Plate Reader (EnSpire Multimode Plate Reader, PerKin Elmer).

**Intracellular Uptake:** To determine the intracellular uptake, TCP was first loaded with coumarin-6 by the addition of coumarin-6 in ethanol. The 4T1/B16-F10/CAF cells were cocultured with coumarin@TCP for 8 h, followed by washing twice with PBS to remove free TCP.  $1 \mu\text{g mL}^{-1}$  of Hoechst 33258 was added to the medium and cultured for 30 min. The dye was removed by washing twice with PBS. The fluorescent images were taken by LSCM. The TCP were tracked by the fluorescence of coumarin ( $\lambda_{\text{ex}} = 490$  nm,  $\lambda_{\text{em}} = 515$  nm).

**In vitro cytotoxicity:** Firstly, 4T1, B16-F10 and CAF were cultured in DMEM media supplemented with 1% penicillin/streptomycin (PS) and 10% fetal bovine serum (FBS). Then the cells were seeded into 96-well plates ( $\sim 5000$  cells per well) at  $37^\circ\text{C}$  with a 5%  $\text{CO}_2$  atmosphere for 24 h.  $200 \mu\text{g mL}^{-1}$  of TCP were added after the removal of DMEM completed medium, and the cells were cultured for another 24 h before CCK-8 assay. After the cells were cultured with CCK-8 solution for 1 h, a microplate reader was applied to measure the optical density value at a wavelength of 450 nm.

**Cell migration assay:** 4T1 cells were seeded in 6-well plate for 24 h ( $10^5$  cells per well). Then the cells were wounded by dragging a  $10 \mu\text{L}$  pipette tip. PBS buffer was used to wash the cells for three times to remove the cellular debris and different mediums (cytokine: obtained from DC cultured supernatant, and TCP ( $50 \mu\text{g mL}^{-1}$ )) were added into DMEM basic medium and cultured at  $37^\circ\text{C}$ . The cells images were recorded after co-culturing for 12, 24 and 48 h.

Supplementary Figures:

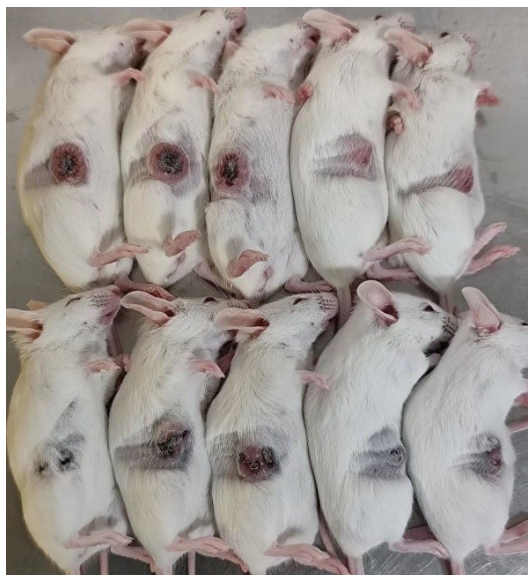

**Figure S1.** The digital photos of 4T1-bearing mice on day 15.

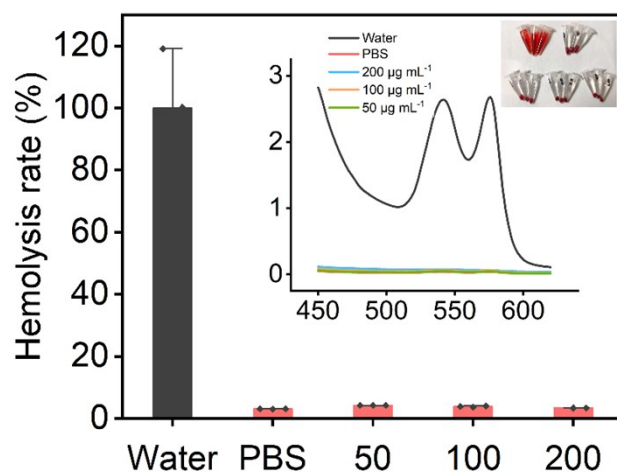

**Figure S2.** Hemolysis rate after the treatments of different concentrations of TCP. Water was set as positive control and PBS as negative one.

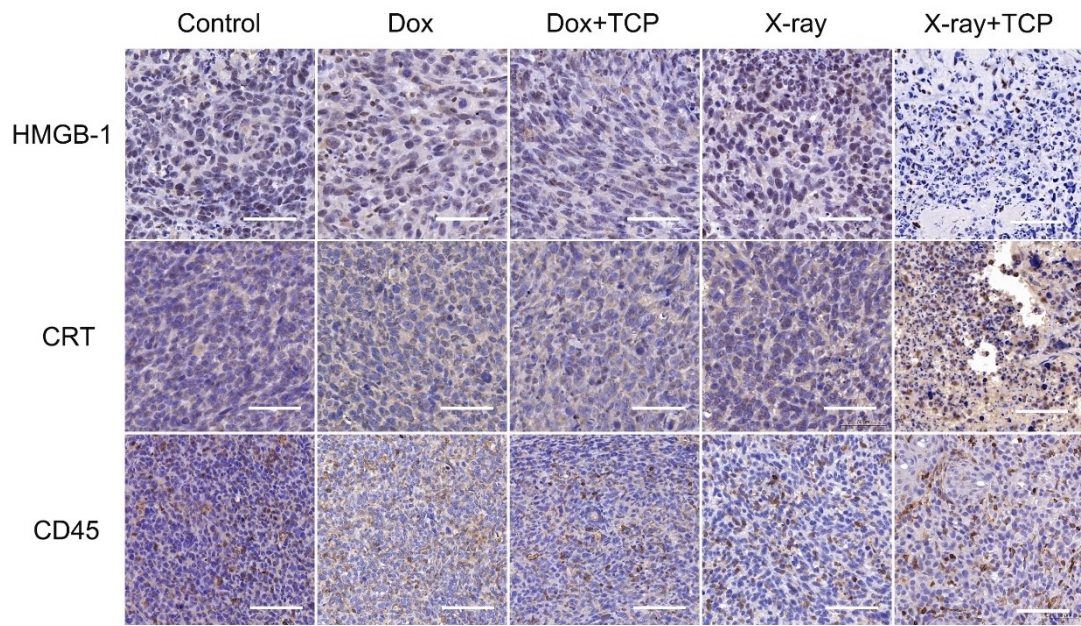

**Figure S3.** Immunohistochemical slices of tumor stained with HMGB-1, CRT and CD45 after different treatments (control, Dox, Dox+TCP, X-ray and X-ray+TCP). Scale bar: 50  $\mu$ m.
